# Supplementary material for: Upregulation of Protein Tyrosine Phosphatase Type IVA Member 3 (PTP4A3/PRL-3) is Associated with Tumor Differentiation and a Poor Prognosis in Human Hepatocellular Carcinoma
Source: Springer Nature journal article supplement (doi:10.1245/s10434-012-2395-2), 2012-10-13
Supplement: MOESM1 [file 9799064]

TABLE-S1. Clinicopathological features of the 42 training cases according to the degree of differentiation of the tumor

| Clinicopathologic factors             | Well<br>(n=16) | Poor<br>(n=26) | <i>P</i> value |
|---------------------------------------|----------------|----------------|----------------|
| Age (y, mean±SD)                      | 66.4±6.38      | 60.8±12.0      | 0.0951         |
| Gender (male/female)                  | 11/5           | 23/3           | 0.2233         |
| Viral infection (HBV/HCV)             | 7/9            | 8/18           | 0.5113         |
| AST (IU/L, mean±SD)                   | 51.0±23.8      | 58.9±33.6      | 0.4151         |
| ALT (IU/L, mean±SD)                   | 47.8±25.1      | 44.5±33.6      | 0.7387         |
| Plt (x10 <sup>9</sup> /L, mean±SD)    | 11.2±4.51      | 15.2±6.39      | 0.0336         |
| ICG-R15 (% , mean±SD)                 | 17.2±6.99      | 20.0±14.5      | 0.4731         |
| PT% (mean±SD)                         | 88.0±14.1      | 79.4±11.3      | 0.0334         |
| T.bil (mg/dl, mean±SD)                | 0.74±0.20      | 1.10±1.43      | 0.3244         |
| Alb (g/dl, mean±SD)                   | 3.94±0.43      | 3.91±0.51      | 0.8337         |
| AFP (ng/ml, log <sub>10</sub> )       | 1.08±0.58      | 2.49±1.37      | 0.0003         |
| PIVKA-II (mAU/ml, log <sub>10</sub> ) | 1.94±0.90      | 2.67±1.22      | 0.0444         |
| Tumor max size (cm, mean±SD)          | 3.83±2.27      | 5.03±3.26      | 0.2028         |
| Tumor max size (cm, ≥2.0vs <2.0)      | 16/0           | 24/2           | 0.5168         |
| Tumor max size (cm, ≥5.0vs <5.0)      | 1/15           | 11/15          | 0.0150         |
| Solitary or Multiple                  | 12/4           | 19/7           | 1.000          |
| Capsular formation (pfc) (-/+)        | 6/10           | 9/17           | 1.000          |
| Capsular invasion (pfc-inf) (-/+)     | 7/9            | 11/15          | 1.000          |
| Portal vein invasion (pvp) (-/+)      | 15/1           | 13/13          | 0.0058         |
| Hepatic vein invasion (pvv) (-/+)     | 14/2           | 21/5           | 0.6897         |
| Vascular invasion (pvp/pvv) (-/+)     | 14/2           | 10/16          | 0.0032         |
| Stages (I+II/III+IV)                  | 10/6           | 7/19           | 0.0291         |
| Recurrence (absent/present)           | 7/9            | 5/21           | 0.1581         |

NOTE: AST, aspartate amino transferase; ALT, alanine aminotransferase; PLT, platelets; ICG-R15, Indocyanine Green Retention Rate at 15 min; PT%, Prothrombin Time; T.bil, Total bilirubin; Alb, albumin; AFP,  $\alpha$ -fetoprotein; PIVKAI, protein induced by vitamin K absence or antagonists II; positive, +; negative, -;

TABLE-S2. Thirty-two probe sets identified as differently expressed genes that satisfied  $p < 0.005$ ,  $FC > 3.0$  by the Wilcoxon rank sum test between poorly and well differentiated HBV associated patients with HCC

| Probe set   | Symbol      | Title                                                              | p-value | Fold-change |
|-------------|-------------|--------------------------------------------------------------------|---------|-------------|
| 225123_at   | ---         | ---                                                                | 0.0003  | 0.30        |
| 225207_at   | PDK4        | pyruvate dehydrogenase kinase, isozyme 4                           | 0.0003  | 0.16        |
| 237737_at   | LOC10028902 | (similar to hCG1744891)                                            | 0.0003  | 0.18        |
| 205960_at   | PDK4        | pyruvate dehydrogenase kinase, isozyme 4                           | 0.0006  | 0.23        |
| 1555989_at  | ---         | ---                                                                | 0.0012  | 0.33        |
| 203911_at   | RAP1GAP     | RAP1 GTPase activating protein                                     | 0.0012  | 4.96        |
| 204351_at   | S100P       | S100 calcium binding protein P                                     | 0.0012  | 22.46       |
| 206574_s_at | PTP4A3      | protein tyrosine phosphatase type IVA, member 3                    | 0.0012  | 3.14        |
| 225626_at   | PAG1        | phosphoprotein associated with glycosphingolipid microdomains 1    | 0.0012  | 6.47        |
| 227354_at   | PAG1        | phosphoprotein associated with glycosphingolipid microdomains 1    | 0.0012  | 5.59        |
| 1554931_at  | CYP4A11     | cytochrome P450, family 4, subfamily A, polypeptide                | 0.0022  | 0.30        |
| 202112_at   | VWF         | von Willebrand factor                                              | 0.0022  | 0.25        |
| 206916_x_at | TAT         | tyrosine aminotransferase                                          | 0.0022  | 0.27        |
| 220177_s_at | TMPRSS3     | transmembrane protease, serine 3                                   | 0.0022  | 4.18        |
| 221661_at   | SLC22A7     | solute carrier family 22 (organic anion transporter), member 7     | 0.0022  | 0.24        |
| 226612_at   | FLJ25076    | probable ubiquitin-conjugating enzyme E2 FLJ25076                  | 0.0022  | 0.29        |
| 231693_at   | FABP1       | Fatty acid binding protein 1, liver                                | 0.0022  | 0.30        |
| 203961_at   | NEBL        | nebullette                                                         | 0.0037  | 6.62        |
| 204580_at   | MMP12       | matrix metalloproteinase 12 (macrophage elastase)                  | 0.0037  | 3.21        |
| 204845_s_at | ENPEP       | glutamyl aminopeptidase (aminopeptidase A)                         | 0.0037  | 0.28        |
| 206265_s_at | GPLD1       | glycosylphosphatidylinositol specific phospholipase I              | 0.0037  | 0.18        |
| 207325_x_at | MAGEA1      | melanoma antigen family A, 1 (directs expression of antigen MZ2-E) | 0.0037  | 0.22        |
| 214079_at   | DHRS2       | dehydrogenase/reductase (SDR family) member 2                      | 0.0037  | 0.09        |
| 214413_at   | TAT         | Tyrosine aminotransferase                                          | 0.0037  | 0.16        |
| 218872_at   | TESC        | tescalcin                                                          | 0.0037  | 5.09        |
| 224650_at   | MAL2        | mal, T-cell differentiation protein 2                              | 0.0037  | 3.33        |
| 225622_at   | PAG1        | phosphoprotein associated with glycosphingolipid microdomains 1    | 0.0037  | 3.75        |
| 226408_at   | TEAD2       | TEA domain family member 2                                         | 0.0037  | 3.19        |
| 227703_s_at | SYTL4       | synaptotagmin-like 4                                               | 0.0037  | 0.27        |
| 227862_at   | TRNP1       | TMF1-regulated nuclear protein 1                                   | 0.0037  | 7.40        |
| 228401_at   | ATAD2       | ATPase family, AAA domain containing 2                             | 0.0037  | 3.19        |
| 238778_at   | MPP7        | membrane protein, palmitoylated 7 (MAGUK p55 subfamily member 7)   | 0.0037  | 3.95        |

NOTE: HBV, hepatitis B virus

TABLE-S3. One hundred-sixty probe sets identified as differently expressed genes that satisfied  $p < 0.005$ ,  $FC > 3.0$  by the Wilcoxon rank sum test between poorly and well differentiated HCV associated patients with HCC.

| Probe set   | Symbol    | Title                                                             | p-value | Fold-change |
|-------------|-----------|-------------------------------------------------------------------|---------|-------------|
| 219232_s_at | EGLN3     | egl nine homolog 3 (C. elegans)                                   | <0.0001 | 3.28        |
| 204288_s_at | SORBS2    | sorbin and SH3 domain containing 2                                | <0.0001 | 0.32        |
| 204351_at   | S100P     | S100 calcium binding protein P                                    | <0.0001 | 32.93       |
| 219863_at   | HERC5     | hect domain and RLD 5                                             | <0.0001 | 0.32        |
| 225728_at   | SORBS2    | sorbin and SH3 domain containing 2                                | <0.0001 | 0.29        |
| 206574_s_at | PTP4A3    | protein tyrosine phosphatase type IVA, member 3                   | <0.0001 | 3.42        |
| 205047_s_at | ASNS      | asparagine synthetase                                             | <0.0001 | 7.86        |
| 214719_at   | SLC46A3   | solute carrier family 46, member 3                                | <0.0001 | 0.20        |
| 227803_at   | ENPP5     | ectonucleotide pyrophosphatase/phosphodiesterase 5 (putative f    | <0.0001 | 4.37        |
| 228293_at   | DEPDC7    | DEP domain containing 7                                           | <0.0001 | 0.24        |
| 240253_at   | ---       | ---                                                               | <0.0001 | 0.28        |
| 205768_s_at | SLC27A2   | solute carrier family 27 (fatty acid transporter), member 2       | <0.0001 | 0.19        |
| 228912_at   | VIL1      | Villin 1                                                          | <0.0001 | 5.31        |
| 205769_at   | SLC27A2   | solute carrier family 27 (fatty acid transporter), member 2       | 0.0001  | 0.24        |
| 206024_at   | HPD       | 4-hydroxyphenylpyruvate dioxygenase                               | 0.0001  | 0.06        |
| 214829_at   | AASS      | aminoadipate-semialdehyde synthase                                | 0.0001  | 0.23        |
| 204602_at   | DKK1      | dickkopf homolog 1 (Xenopus laevis)                               | 0.0001  | 15.29       |
| 222771_s_at | MYEF2     | myelin expression factor 2                                        | 0.0001  | 3.62        |
| 228280_at   | ZC3HAV1L  | zinc finger CCCH-type, antiviral 1-like                           | 0.0001  | 3.91        |
| 237212_at   | ---       | ---                                                               | 0.0001  | 0.29        |
| 206069_s_at | ACADL     | acyl-Coenzyme A dehydrogenase, long chain                         | 0.0001  | 0.29        |
| 230577_at   | ---       | ---                                                               | 0.0001  | 0.08        |
| 210852_s_at | AASS      | aminoadipate-semialdehyde synthase                                | 0.0002  | 0.28        |
| 218816_at   | LRRC1     | leucine rich repeat containing 1                                  | 0.0002  | 4.33        |
| 228988_at   | ZNF711    | zinc finger protein 711                                           | 0.0002  | 4.16        |
| 201387_s_at | UCHL1     | ubiquitin carboxyl-terminal esterase L1 (ubiquitin thiolesterase) | 0.0002  | 3.36        |
| 209260_at   | SFN       | stratifin                                                         | 0.0002  | 4.01        |
| 219404_at   | EPS8L3    | EPS8-like 3                                                       | 0.0002  | 3.55        |
| 228051_at   | LOC202451 | Hypothetical protein LOC202451                                    | 0.0002  | 4.73        |
| 229700_at   | ZNF738    | zinc finger protein 738                                           | 0.0002  | 3.82        |
| 230602_at   | ACMSD     | aminocarboxymuconate semialdehyde decarboxylase                   | 0.0002  | 0.23        |
| 244741_s_at | MGC9913   | hypothetical protein MGC9913                                      | 0.0002  | 3.15        |
| 205222_at   | EHHADH    | enoyl-Coenzyme A, hydratase/3-hydroxyacyl Coenzyme A dehy         | 0.0003  | 0.26        |
| 205506_at   | VIL1      | villin 1                                                          | 0.0003  | 6.48        |
| 214751_at   | ZNF468    | zinc finger protein 468                                           | 0.0003  | 3.94        |
| 222071_s_at | SLCO4C1   | solute carrier organic anion transporter family, member 4C1       | 0.0003  | 3.67        |
| 222108_at   | AMIGO2    | adhesion molecule with Ig-like domain 2                           | 0.0003  | 3.81        |
| 242496_at   | ---       | ---                                                               | 0.0003  | 0.20        |
| 210652_s_at | TTC39A    | tetratricopeptide repeat domain 39A                               | 0.0004  | 4.14        |
| 218847_at   | IGF2BP2   | insulin-like growth factor 2 mRNA binding protein 2               | 0.0004  | 5.49        |
| 229614_at   | ZNF320    | zinc finger protein 320                                           | 0.0004  | 3.33        |
| 235144_at   | ---       | ---                                                               | 0.0004  | 5.15        |
| 202934_at   | HK2       | hexokinase 2                                                      | 0.0005  | 3.91        |
| 204704_s_at | ALDOB     | aldolase B, fructose-bisphosphate                                 | 0.0005  | 0.10        |
| 208949_s_at | LGALS3    | lectin, galactoside-binding, soluble, 3                           | 0.0005  | 3.83        |
| 228728_at   | C7orf58   | chromosome 7 open reading frame 58                                | 0.0005  | 0.33        |
| 230030_at   | HS6ST2    | heparan sulfate 6-O-sulfotransferase 2                            | 0.0005  | 4.38        |
| 231856_at   | KIAA1244  | KIAA1244                                                          | 0.0005  | 3.12        |
| 232494_at   | CYP8B1    | cytochrome P450, family 8, subfamily B, polypeptide 1             | 0.0005  | 0.07        |
| 241703_at   | RUNDC3B   | RUN domain containing 3B                                          | 0.0005  | 0.29        |
| 206930_at   | GLYAT     | glycine-N-acyltransferase                                         | 0.0006  | 0.11        |

|              |                      |                                                                    |        |       |
|--------------|----------------------|--------------------------------------------------------------------|--------|-------|
| 208029_s_at  | LAPTM4B              | lysosomal protein transmembrane 4 beta                             | 0.0006 | 4.44  |
| 213293_s_at  | TRIM22               | tripartite motif-containing 22                                     | 0.0006 | 0.33  |
| 213664_at    | SLC1A1               | solute carrier family 1 (neuronal/epithelial high affinity glutama | 0.0006 | 0.13  |
| 214621_at    | GYS2                 | glycogen synthase 2 (liver)                                        | 0.0006 | 0.09  |
| 225681_at    | CTHRC1               | collagen triple helix repeat containing 1                          | 0.0006 | 10.27 |
| 230554_at    | ACSM2A               | acyl-CoA synthetase medium-chain family member 2A                  | 0.0006 | 0.15  |
| 232449_at    | BCO2                 | beta-carotene oxygenase 2                                          | 0.0006 | 0.27  |
| 243193_at    | ---                  | ---                                                                | 0.0006 | 3.84  |
| 1554679_a_at | LAPTM4B              | lysosomal protein transmembrane 4 beta                             | 0.0008 | 6.46  |
| 203543_s_at  | KLF9                 | Kruppel-like factor 9                                              | 0.0008 | 0.32  |
| 203789_s_at  | SEMA3C               | sema domain, immunoglobulin domain (Ig), short basic domain,       | 0.0008 | 3.48  |
| 205352_at    | SERPINI1             | serpin peptidase inhibitor, clade I (neuroserpin), member 1        | 0.0008 | 3.57  |
| 208767_s_at  | LAPTM4B              | lysosomal protein transmembrane 4 beta                             | 0.0008 | 3.89  |
| 208837_at    | TMED3                | transmembrane emp24 protein transport domain containing 3          | 0.0008 | 3.85  |
| 215321_at    | RUNDC3B              | RUN domain containing 3B                                           | 0.0008 | 0.29  |
| 216687_x_at  | UGT2B15              | UDP glucuronosyltransferase 2 family, polypeptide B15              | 0.0008 | 0.18  |
| 227794_at    | GLYATL1              | glycine-N-acyltransferase-like 1                                   | 0.0008 | 0.18  |
| 228494_at    | PPP1R9A              | protein phosphatase 1, regulatory (inhibitor) subunit 9A           | 0.0008 | 4.82  |
| 230931_at    | ---                  | ---                                                                | 0.0008 | 0.28  |
| 231790_at    | DMGDH                | dimethylglycine dehydrogenase                                      | 0.0008 | 0.27  |
| 40665_at     | FMO3                 | flavin containing monooxygenase 3                                  | 0.0008 | 0.18  |
| 1552568_at   | RTP3                 | receptor (chemosensory) transporter protein 3                      | 0.0010 | 0.26  |
| 205568_at    | AQP9                 | aquaporin 9                                                        | 0.0010 | 0.28  |
| 207097_s_at  | SLC17A2              | solute carrier family 17 (sodium phosphate), member 2              | 0.0010 | 0.25  |
| 209173_at    | AGR2                 | anterior gradient homolog 2 (Xenopus laevis)                       | 0.0010 | 7.99  |
| 211006_s_at  | KCNB1                | potassium voltage-gated channel, Shab-related subfamily, mem       | 0.0010 | 0.19  |
| 217127_at    | CTH                  | cystathionase (cystathionine gamma-lyase)                          | 0.0010 | 0.21  |
| 219010_at    | C1orf106             | chromosome 1 open reading frame 106                                | 0.0010 | 6.36  |
| 222572_at    | PDP1                 | pyruvate dehydrogenase phosphatase catalytic subunit 1             | 0.0010 | 3.60  |
| 241914_s_at  | ACSM2A ///<br>ACSM2B | acyl-CoA synthetase medium-chain family member 2A /// acyl-t       | 0.0010 | 0.23  |
| 243951_at    | ABCB1                | ATP-binding cassette, sub-family B (MDR/TAP), member 1             | 0.0010 | 0.32  |
| 1552569_a_at | RTP3                 | receptor (chemosensory) transporter protein 3                      | 0.0012 | 0.15  |
| 1552767_a_at | HS6ST2               | heparan sulfate 6-O-sulfotransferase 2                             | 0.0012 | 4.58  |
| 201251_at    | PKM2                 | pyruvate kinase, muscle                                            | 0.0012 | 3.26  |
| 201428_at    | CLDN4                | claudin 4                                                          | 0.0012 | 3.23  |
| 206496_at    | FMO3                 | flavin containing monooxygenase 3                                  | 0.0012 | 0.22  |
| 209994_s_at  | ABCB1 /// ABC        | ATP-binding cassette, sub-family B (MDR/TAP), member 1 ///         | 0.0012 | 0.29  |
| 214413_at    | TAT                  | Tyrosine aminotransferase                                          | 0.0012 | 0.17  |
| 214734_at    | EXPH5                | exophilin 5                                                        | 0.0012 | 0.29  |
| 231187_at    | SLC28A1              | solute carrier family 28 (sodium-coupled nucleoside transporter)   | 0.0012 | 0.31  |
| 33322_i_at   | SFN                  | stratifin                                                          | 0.0012 | 5.74  |
| 212092_at    | PEG10                | paternally expressed 10                                            | 0.0015 | 7.14  |
| 203028_s_at  | CYBA                 | cytochrome b-245, alpha polypeptide                                | 0.0015 | 3.06  |
| 206068_s_at  | ACADL                | acyl-Coenzyme A dehydrogenase, long chain                          | 0.0015 | 0.25  |
| 211357_s_at  | ALDOB                | aldolase B, fructose-bisphosphate                                  | 0.0015 | 0.26  |
| 214069_at    | ACSM2A /// AC        | acyl-CoA synthetase medium-chain family member 2A /// acyl-t       | 0.0015 | 0.26  |
| 216379_x_at  | CD24                 | CD24 molecule                                                      | 0.0015 | 8.21  |
| 228391_at    | CYP4V2               | cytochrome P450, family 4, subfamily V, polypeptide 2              | 0.0015 | 0.29  |
| 236652_at    | LOC149703            | hypothetical protein LOC149703                                     | 0.0015 | 0.25  |
| 204694_at    | AFP                  | alpha-fetoprotein                                                  | 0.0019 | 7.85  |
| 206226_at    | HRG                  | histidine-rich glycoprotein                                        | 0.0019 | 0.21  |
| 206913_at    | BAAT                 | bile acid Coenzyme A: amino acid N-acyltransferase (glycine N      | 0.0019 | 0.31  |
| 207392_x_at  | UGT2B15              | UDP glucuronosyltransferase 2 family, polypeptide B15              | 0.0019 | 0.24  |
| 209550_at    | NDN                  | necdin homolog (mouse)                                             | 0.0019 | 4.05  |
| 209771_x_at  | CD24                 | CD24 molecule                                                      | 0.0019 | 7.62  |
| 213920_at    | CUX2                 | cut-like homeobox 2                                                | 0.0019 | 0.19  |

|             |                                                                                 |                                                                    |        |      |
|-------------|---------------------------------------------------------------------------------|--------------------------------------------------------------------|--------|------|
| 218051_s_at | NT5DC2                                                                          | 5'-nucleotidase domain containing 2                                | 0.0019 | 3.82 |
| 222943_at   | GBA3                                                                            | glucosidase, beta, acid 3 (cytosolic)                              | 0.0019 | 0.16 |
| 231691_at   | C3P1                                                                            | complement component 3 precursor pseudogene                        | 0.0019 | 0.23 |
| 232428_at   | MOGAT2                                                                          | monoacylglycerol O-acyltransferase 2                               | 0.0019 | 0.22 |
| 233587_s_at | SIPA1L2                                                                         | signal-induced proliferation-associated 1 like 2                   | 0.0019 | 4.03 |
| 33323_r_at  | SFN                                                                             | stratifin                                                          | 0.0019 | 6.65 |
| 204439_at   | IFI44L                                                                          | interferon-induced protein 44-like                                 | 0.0024 | 0.31 |
| 206170_at   | ADRB2                                                                           | adrenergic, beta-2-, receptor, surface                             | 0.0024 | 0.31 |
| 206916_x_at | TAT                                                                             | tyrosine aminotransferase                                          | 0.0024 | 0.31 |
| 207201_s_at | SLC22A1                                                                         | solute carrier family 22 (organic cation transporter), member 1    | 0.0024 | 0.06 |
| 218454_at   | PLBD1                                                                           | phospholipase B domain containing 1                                | 0.0024 | 3.09 |
| 219580_s_at | TMC5                                                                            | transmembrane channel-like 5                                       | 0.0024 | 3.87 |
| 220017_x_at | CYP2C9                                                                          | cytochrome P450, family 2, subfamily C, polypeptide 9              | 0.0024 | 0.19 |
| 225081_s_at | CDCA7L                                                                          | cell division cycle associated 7-like                              | 0.0024 | 3.01 |
| 225316_at   | MFSD2                                                                           | major facilitator superfamily domain containing 2                  | 0.0024 | 0.20 |
| 226096_at   | FNDC5                                                                           | fibronectin type III domain containing 5                           | 0.0024 | 0.18 |
| 229019_at   | ZNF385B                                                                         | zinc finger protein 385B                                           | 0.0024 | 0.29 |
| 235700_at   | CT45A5                                                                          | cancer/testis antigen family 45, member A5                         | 0.0024 | 3.09 |
| 31835_at    | HRG                                                                             | histidine-rich glycoprotein                                        | 0.0024 | 0.22 |
| 1553986_at  | RASEF                                                                           | RAS and EF-hand domain containing                                  | 0.0029 | 3.26 |
| 201416_at   | SOX4                                                                            | SRY (sex determining region Y)-box 4                               | 0.0029 | 3.78 |
| 204428_s_at | LCAT                                                                            | lecithin-cholesterol acyltransferase                               | 0.0029 | 0.29 |
| 205866_at   | FCN3                                                                            | ficolin (collagen/fibrinogen domain containing) 3 (Hakata antigen) | 0.0029 | 0.26 |
| 206797_at   | NAT2                                                                            | N-acetyltransferase 2 (arylamine N-acetyltransferase)              | 0.0029 | 0.21 |
| 208650_s_at | CD24                                                                            | CD24 molecule                                                      | 0.0029 | 8.85 |
| 208651_x_at | CD24                                                                            | CD24 molecule                                                      | 0.0029 | 7.02 |
| 209656_s_at | TMEM47                                                                          | transmembrane protein 47                                           | 0.0029 | 0.29 |
| 209772_s_at | CD24                                                                            | CD24 molecule                                                      | 0.0029 | 4.50 |
| 211756_at   | PTH1H                                                                           | parathyroid hormone-like hormone                                   | 0.0029 | 3.12 |
| 214421_x_at | CYP2C9                                                                          | cytochrome P450, family 2, subfamily C, polypeptide 9              | 0.0029 | 0.17 |
| 219733_s_at | SLC27A5                                                                         | solute carrier family 27 (fatty acid transporter), member 5        | 0.0029 | 0.24 |
| 227194_at   | FAM3B                                                                           | family with sequence similarity 3, member B                        | 0.0029 | 5.23 |
| 231683_at   | GLYAT                                                                           | glycine-N-acyltransferase                                          | 0.0029 | 0.25 |
| 204705_x_at | ALDOB                                                                           | aldolase B, fructose-bisphosphate                                  | 0.0035 | 0.28 |
| 207086_x_at | GAGE1 /// GAC G antigen 1 /// G antigen 12C /// G antigen 12D /// G antigen 12E |                                                                    | 0.0035 | 8.07 |
| 207256_at   | MBL2                                                                            | mannose-binding lectin (protein C) 2, soluble (opsonic defect)     | 0.0035 | 0.33 |
| 207608_x_at | CYP1A2                                                                          | cytochrome P450, family 1, subfamily A, polypeptide 2              | 0.0035 | 0.32 |
| 209612_s_at | ADH1B                                                                           | alcohol dehydrogenase 1B (class I), beta polypeptide               | 0.0035 | 0.32 |
| 209613_s_at | ADH1B                                                                           | alcohol dehydrogenase 1B (class I), beta polypeptide               | 0.0035 | 0.27 |
| 209614_at   | ADH1B                                                                           | alcohol dehydrogenase 1B (class I), beta polypeptide               | 0.0035 | 0.15 |
| 210168_at   | C6                                                                              | complement component 6                                             | 0.0035 | 0.22 |
| 218312_s_at | ZSCAN18                                                                         | zinc finger and SCAN domain containing 18                          | 0.0035 | 3.26 |
| 219954_s_at | GBA3                                                                            | glucosidase, beta, acid 3 (cytosolic)                              | 0.0035 | 0.21 |
| 226051_at   | SELM                                                                            | selenoprotein M                                                    | 0.0035 | 3.84 |
| 240304_s_at | TMC5                                                                            | transmembrane channel-like 5                                       | 0.0035 | 6.17 |
| 203214_x_at | CDC2                                                                            | cell division cycle 2, G1 to S and G2 to M                         | 0.0043 | 3.08 |
| 204580_at   | MMP12                                                                           | matrix metalloproteinase 12 (macrophage elastase)                  | 0.0043 | 3.83 |
| 205476_at   | CCL20                                                                           | chemokine (C-C motif) ligand 20                                    | 0.0043 | 3.98 |
| 205554_s_at | DNASE1L3                                                                        | deoxyribonuclease I-like 3                                         | 0.0043 | 0.25 |
| 216025_x_at | CYP2C9                                                                          | cytochrome P450, family 2, subfamily C, polypeptide 9              | 0.0043 | 0.19 |
| 225056_at   | SIPA1L2                                                                         | signal-induced proliferation-associated 1 like 2                   | 0.0043 | 4.28 |
| 230316_at   | SEC14L2                                                                         | SEC14-like 2 ( <i>S. cerevisiae</i> )                              | 0.0043 | 0.27 |
| 266_s_at    | CD24                                                                            | CD24 molecule                                                      | 0.0043 | 7.78 |

NOTE: HCV, hepatitis C virus

TABLE-S4. The candidate genes were associated with poorly differentiated HCCs whose hepatic backgrounds were associated with HBV or HCV

| Probe set   | Symbol | Title                                             | well vs. poor in HBV(+) |             | well vs. poor in HCV(+) |             |
|-------------|--------|---------------------------------------------------|-------------------------|-------------|-------------------------|-------------|
|             |        |                                                   | p-value                 | Fold-change | p-value                 | Fold-change |
| 204351_at   | S100P  | S100 calcium binding protein P                    | 0.0012                  | 22.46       | <0.0001                 | 32.93       |
| 206574_s_at | PTP4A3 | protein tyrosine phosphatase type IVA, member 3   | 0.0012                  | 3.14        | <0.0001                 | 3.42        |
| 206916_x_at | TAT    | tyrosine aminotransferase                         | 0.0022                  | 0.27        | 0.0024                  | 0.31        |
| 204580_at   | MMP12  | matrix metalloproteinase 12 (macrophage elastase) | 0.0037                  | 3.21        | 0.0043                  | 3.83        |
| 214413_at   | TAT    | Tyrosine aminotransferase                         | 0.0037                  | 0.16        | 0.0012                  | 0.17        |

NOTE: HBV, hepatitis B virus; HCV, hepatitis C virus

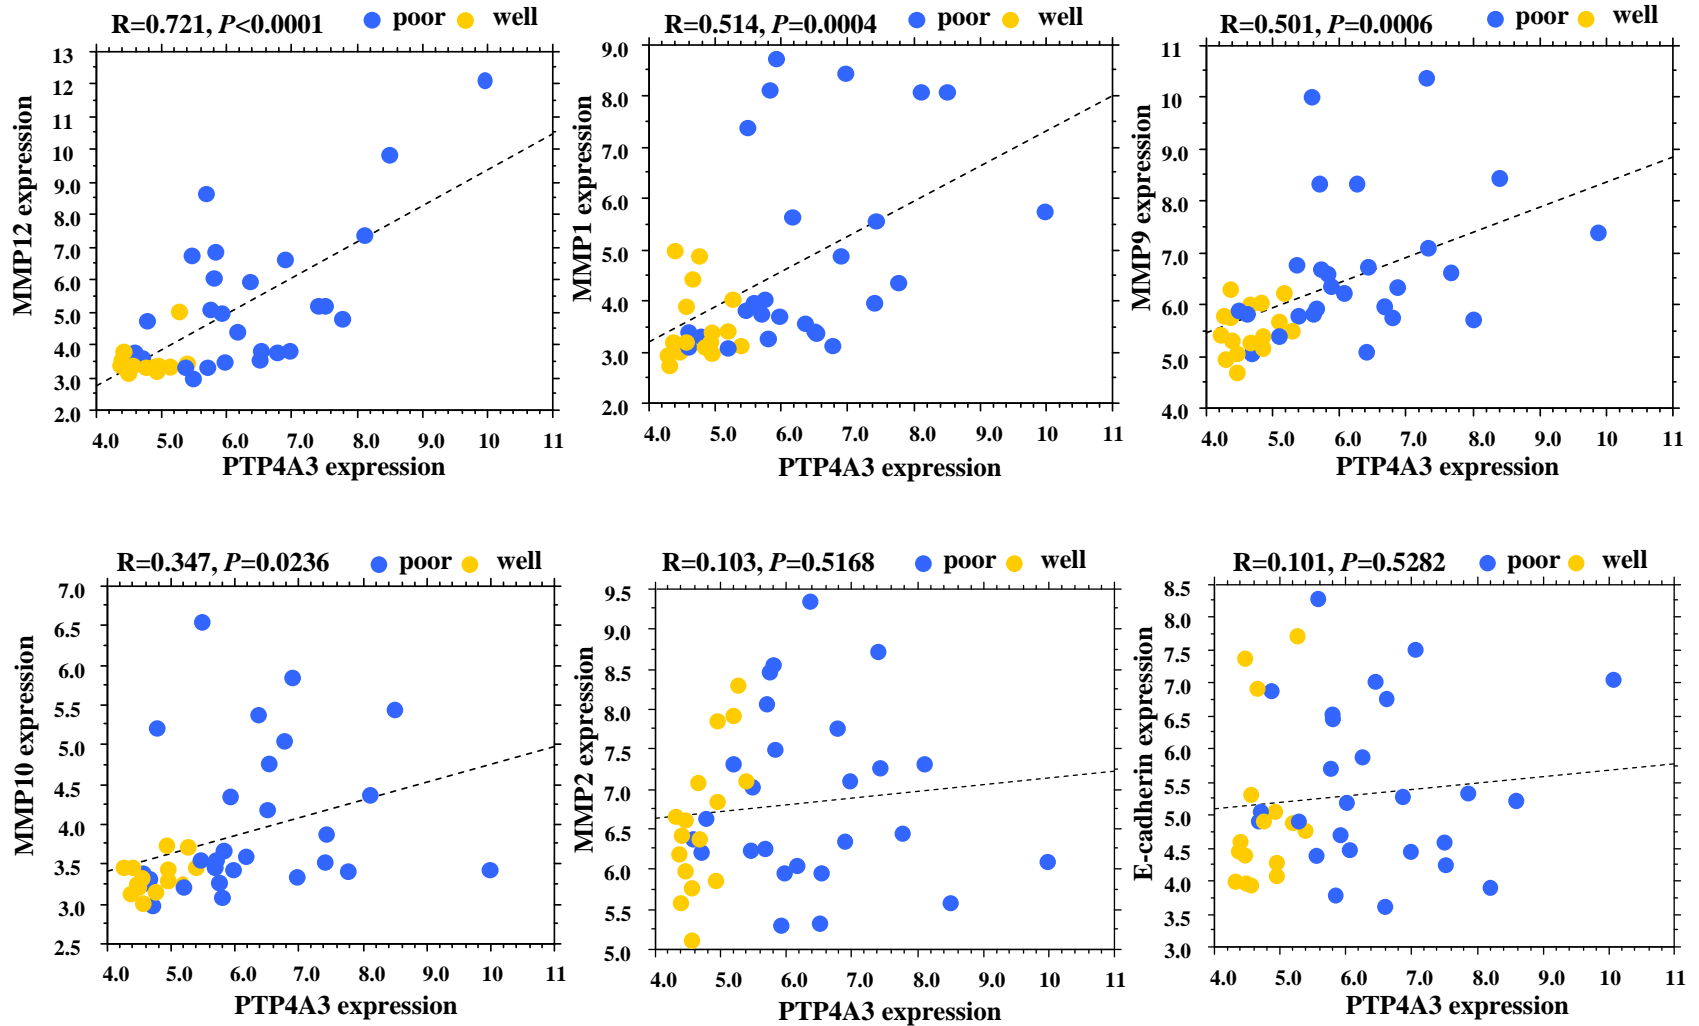

**Fig. S1**

**Abudurehman Mayinuer**
